# Supplementary material for: Colloidal CdSe nanocrystals are inherently defective
Source: PubMed Central journal article supplement (PMC7873310; doi:10.1038/s41467-021-21153-z), 2021-02-09
Supplement: 41467_2021_21153_MOESM3_ESM.pdf [file 41467_2021_21153_MOESM3_ESM.pdf]

## **Description of Additional Supplementary Files**

File Name: Supplementary Data 1

Description: Optimized XYZ coordinates for all QD structures.

File Name: Supplementary Data 2

Description: TDDFT and TDA input files for QChem.
